# Supplementary material
Source: PubMed Central journal article supplement (PMC4862698)
Supplement: IAI.00076-16_zii999091681so1.pdf [file IAI.00076-16_zii999091681so1.pdf]

**Table S1. Primers used in this study**

| <b>Primer identification</b> | <b>Sequence (5'-3')</b>                              |
|------------------------------|------------------------------------------------------|
| Pr1002                       | TGTCGTTCCCTGTTATTCCTTTACAAACCAGTTAGAAATGATGTG        |
| Pr1203                       | ATGTCCAAGCTAAACCTGTTTACCCTCGACTATTATTTTCAGACTA       |
| Pr1235                       | AATCCCTAAATGTCGTTCTCGAGATTCCTTTAAGAGATGT             |
| Pr1236                       | CTACTTACAGCGGCCGCTTCGAGTTTTTCCAGGATTTT               |
| Pr1237                       | ATTTATTTATGAAATAGCTAGCAAATTTTCGATTACACAA             |
| Pr1238                       | TTGTGTAATCGAAATTTTGCTAGCTATTTTCATAAATAAAT            |
| Pr1293                       | TGGATAATTTGACCAGGCATAGAACCTA                         |
| Pr1298                       | AGCTAACTTAAAAGCATTAGTGATAGAA                         |
| Pr1299                       | CTTAGAAGCCAGCCTGTTGAG                                |
| Pr1307                       | TGTAAGCATATGTCAGAATCCCTAAATGTCGTT                    |
| Pr1370                       | GTGAAGATTTGCCTAGGTTTGGGCTTATTCCAGAAT                 |
| Pr1425                       | TGGTTTGGCTGCGAGTATG                                  |
| Pr1426                       | CCACCTAAAGGCTGATGAATC                                |
| Pr1427                       | AAGCACAGAATGGATAAGGTCAG                              |
| Pr1428                       | GAATAAGCCCAAATCTAGTCAAATC                            |
| Pr1429                       | GCTATGCCGCCTTCTTCATC                                 |
| Pr1430                       | CTTTTAACTTTTGCCCTCTTACCC                             |
| Pr1529                       | ATAAAAAGGAAAACCTAATAATGTCAGAACCCTAAATGT              |
| Pr1607                       | GCACCGATATCCTAGGGGTTCTGGCAAATATTCTGAAATG             |
| Pr1608                       | AAGGCCGATATCTCGAGGATCCCCGGGTACCAATTGCATGAATACTGTTTCC |
| Pr1642                       | GCTAAACCTAGGCTACTTAAGCAAATGGGA                       |
| Pr1643                       | AAATAGAACCTAGGAATAATGTTAGCGAATT                      |
| Pr1644                       | ACTAGATTATTAGTTATCATTATTAAGTTTTCTTTTTAT              |
| Pr1645                       | ATAAAAAGGAAAACCTAATAATGATAACTAATAATCTAGT             |
| Pr1658                       | TTTTACAGCGTCTTTAAGACC                                |
| Pr1667                       | GTGTCACCCGGGAAATATCAAAAACTCTCTCT                     |
| Pr1690                       | TTTCTCGGGTACCAATTGCATTATTAAGTTTTCT                   |
| Pr1691                       | GACATAGGGTACCAATTGCATAAATTACATCCTCC                  |
| Pr1699                       | ATTTATACCCTAGGGAAAAGTGAAAGACCAAG                     |
| Pr1700                       | AACTAGTGGTACCAATTGCATTTATAACCTCTCTT                  |
| Pr1701                       | GTGACGTACCTAGGCACTCAGCTAATCTTGT                      |
| Pr1702                       | GAACAATATGGTACCAATTGCATTTTAGTAAGTTGACTTCC            |
| Pr1703                       | CTTGGTGACCTAGGGAAAGAATCTATAGATGC                     |
| Pr1704                       | CACTTACTAATGGTACCAATTGCATGTTTTTAAACTCCTT             |
| Pr1705                       | TCCAGTTACCTAGGCCGTAAAATTGAATCGGA                     |
| Pr1706                       | TTACTGAAGGTACCAATTGCATTATTTTCCCCTAAG                 |
| Pr1732                       | GCTAGCTAATGCAATTGGTACCGAATGTGTTATCCTCAAT             |
| Pr1733                       | GCCAACTGCTCGAGCGAGACTTCTCTAAACCTT                    |
| Pr1812                       | CATGAACAAGAGTGAATTAGTAAGTGC                          |
| Pr1813                       | CAAAACCTACTAGAGTTACGCTATCACC                         |
| Pr3110                       | GATCCTCTAGAAGCGGCCGCCATGGTACCGGGCGCGCCCTCGAGGCTAGCG  |
| Pr3111                       | AATTCGCTAGCCTCGAGGGCGCGCCCGGTACCATGGCGGCCGCTTCTAGAG  |
| Pr3230                       | ATAGCGGCCGCTCAGAACCCTAAATGTCGTT                      |
| Pr3231                       | AGTGGCGCGCCAATGCAGTGTTC AACAGTTAAATA                 |
| Pr5476                       | ATAGCGGCCGCACTAATAATCTAGTTCCTACCGTAATTG              |

Pr5477 AGTGGCGCGCCGTAAGTTGACTTCCTTTAATTATTTAATAA  
Pr5478 ATAGCGGCCGCGCTAAAATTCTATATTGTTCTTTTTGT  
Pr5479 AGTGGCGCGCCACATCCTCCTGTAAATTATTAGATTATAT  
Pr6434 ATAGCGGCCGCGCAGGAATTTGAGAATGAACAATTCTA  
Pr6435 AGTGGCGCGCCGTAGGTTTTTAATCTTAAGATAAAAATATCT  
Pr7259 CGGAATTCAGGAGGATTACATATGTCAGAACCCCTAAATGTCGTT  
Pr7260 GGGGTACCCTAATGATGATGATGGTGATGAAAACTCTCTCTAAAACCTCTT  
Pr7261 CATGCCATGGGCATTAGAAAAAGTATTTTAGTAG  
Pr7262 CGGAATTCCTAATGATGATGATGGTGATGGAACCTCTTTTATTACCACATCTA  
Pr7263 CATGCCATGGGCAGTAAAGAAATTAGATAACAATC  
Pr7264 CGGAATTCCTAATGATGATGATGGTGATGAGATTTTATTGATATCTTTTTAG  
Pr7405 CGACGCGTATGATTAGAAAAAGTATTTTAGTAGAA  
Pr7406 CCCCCGGGCTAATGATGATGATGGTGATGGAACCTCTTTTATTACCACATCTA  
Pr7407 CGACGCGTATGAGTAAAGAAATTAGATAACAATC  
Pr7408 CCCCCGGGCTAATGATGATGATGGTGATGAGATTTTATTGATATCTTTTTAG  
Pr7409 CGACGCGTATGTCAAATATTCCTAAAGAATTAAAG  
Pr7410 CCCCCGGGCTAATGATGATGATGGTGATGATCCTCAAGAGTTTTTGCATAAGC  
Pr7411 CGACGCGTATGAACAATTCTAAGATTATTACAATTG  
Pr7412 CCCCCGGGCTAATGATGATGATGGTGATGAATAGTTATTTTTTTAATAACAC  
Pr7516 CATGCCATGGGCTCAAATATTCCTAAAGAATTAAAG  
Pr7517 CGGAATTCCTAATGATGATGATGGTGATGATCCTCAAGAGTTTTTGCATAAGC  
Pr7518 CATGCCATGGGCAACAATTCTAAGATTATTACAATTG  
Pr7519 CGGAATTCCTAATGATGATGATGGTGATGAATAGTTATTTTTTTAATAACAC  
Pr7522 CATGCCATGGGCGCTAAAATTCTATATTGTTCTTTT  
Pr7523 CGGAATTCCTAATGATGATGATGGTGATGGATTATATCTTTTAATTGTTTTTGC  
Pr7631 CGACGCGTATGGCTAAAATTCTATATTGTTCTTTT  
Pr7632 CCCCCGGGCTAATGATGATGATGGTGATGGATTATATCTTTTAATTGTTTTTGC  
Pr7751 CATGCCATGGGCTCTAGAAGATACTGCGTCATAAA  
Pr7752 CGGAATTCCTAATGATGATGATGGTGATGAATATTTATGTACTTGTGTTCAAG  
Pr7755 CATGCCATGGGCCCGACAGCAGATAAGGAACTAT  
Pr7756 CGGAATTCCTAATGATGATGATGGTGATGAAGAACTGAAAATAAGTTTTTAG  
Pr7861 AATCTCGAGACCTTAATTTTGTG  
Pr7862 ATGATGATGATGGTGATGGAACCTC  
Pr7863 GTTACCTGACAATATAGACAGTGAC  
Pr7864 ATGATGATGATGGTGATGAGAT  
Pr7865 CATATACCTTCATCTGAAGATATTG  
Pr7866 ATGATGATGATGGTGATGGATTAT  
Pr8151 GATATGAATTTTATTGTCAAGACAG  
Pr8152 ATGATGATGATGGTGATGAATATT  
Pr9891 CATGCCATGGGCAAAAAGATAGTTCATCTATTATTAGT  
Pr9892 CGGAATTCCTAATGATGATGATGGTGATGGCCACCGAAAGATTTGGTTTTATC  
Pr9893 CATGCCATGGGCGGTAGTGGTTTTATGTTTTATAAG  
Pr9894 CGGAATTCCTAATGATGATGATGGTGATGCTTTAAATCCCCTTTGTTACCT  
Pr9895 CATGCCATGGGCAGAAGTAAGTTATTATTATAGC  
Pr9896 CGGAATTCCTAATGATGATGATGGTGATGATTTTGCTGTAAGTATGCATTGAC  
Pr9897 CATGCCATGGGCAAAAAGGTTTGTACATTTAATAATA  
Pr9898 CGGAATTCCTAATGATGATGATGGTGATGGACACTGCCCTCATAATAAAGTT  
Pr9901 CATGCCATGGGCACAAGTAGAAATGTTGATAACCCG  
Pr9902 CGGAATTCCTAATGATGATGATGGTGATGAATATTTCTACTTTTCATCTTCATC

Pr9903 CATGCCATGGGCAAAAACTATTATTTATTACGGCT  
Pr9904 CGGAATTCCTAATGATGATGATGGTGATGGCTTGGCTTACCTTTACTAAAATC  
Pr10075 CATGCCATGGGCGATAAATTTGAATCTATGAAAAGCTT  
Pr10076 CGGAATTCCTAATGATGATGATGGTGATGTAATATAGTTATATTCTCGACTAAGT  
Pr10077 CATGCCATGGGCAGTGTACAAGTTGGTGTAAATAATGG  
Pr10078 CGGAATTCCTAATGATGATGATGGTGATGGTGCTCCCTAGGATCAGGATTTTCC  
Pr10081 CATGCCATGGGCTCAGAAGAAAAATTACAACAATCA  
Pr10082 CGGAATTCCTAATGATGATGATGGTGATGTAATGTATCTACTTTTACTGTTGCAC  
Pr10083 CATGCCATGGGCCAAGTTACTTTAGAGAAAAAAGAAGG  
Pr10084 GCGTCGACCTAATGATGATGATGGTGATGGAAGCCAGCCTGTTGAGCTTGCAT  
Pr10091 CATGCCATGGGCGGAAAAATAATAGGTATAGATTTAGG  
Pr10092 CGGAATTCCTAATGATGATGATGGTGATGTTTTTTGTCGTCTTCAACATCCTC  
Pr10093 CATGCCATGGGCTTAATAGATAATAAATCTCTGCCTAC  
Pr10094 CGGAATTCCTAATGATGATGATGGTGATGAATGATACTATGGAGAATATCCTTCA  
Pr10095 CATGCCATGGGCACTCCATTTTTTAAACTGATAAAA  
Pr10096 CGGAATTCCTAATGATGATGATGGTGATGTTTTTTACGACTATTAAAATATTCTC  
Pr10097 CATGCCATGGGCTCAGATAACAGATATCAAATTACCA  
Pr10098 CGGAATTCCTAATGATGATGATGGTGATGGCTATTAGCTAGATTACAATATAATG  
Pr10099 CATGCCATGGGCAATAAATCTAAAACTCTTACTATTT  
Pr10100 CGGAATTCCTAATGATGATGATGGTGATGTTTTACAACACTGACAACAACATTT  
Pr10246 CAGTTGGTTTTGCAATTGAAGATTTT  
Pr10247 ATGATGATGATGGTGATGAAGAAC  
Pr10256 CATGATGCTCAGCACTTACTATTAG  
Pr10257 ATGATGATGATGGTGATGAATGAT
